# Supplementary material for: Identification of juvenility-associated genes in the mouse hepatocytes and cardiomyocytes
Source: Springer Nature journal article supplement (doi:10.1038/s41598-018-21445-3), 2018-02-09

## **Supplementary Information**

### **Identification of juvenility-associated genes in the mouse hepatocytes and cardiomyocytes.**

#### **Authors**

\*Faidruz Azura Jam<sup>#</sup>, \*Yosuke Kadota<sup>#</sup>, \*Anarmaa Mendsaikhan<sup>#</sup>, \*Ikuo Tooyama,

<sup>\*,†</sup>Masaki Mori

#### **Affiliations**

\*Molecular Neuroscience Research Center (MNRC), Shiga University of Medical Science, Tsukinowa-cho, Seta, Otsu, Shiga, 520-2192, Japan.

<sup>†</sup>Department of Systems BioMedicine, Tokyo Medical and Dental University, 1-5-45, Yushima, Bunkyo-ku, Tokyo, 113-8510, Japan.

<sup>#</sup>These authors contributed equally to this work.

## Supplementary Figures

### Supplementary Figure S1. Appearance of the isolated hepatocytes and cardiomyocytes.

(A) The image of hepatocytes isolated from the P1 mouse taken one day after the isolation. Scale bar, 50  $\mu\text{m}$ .

(B) The image of hepatocytes isolated from the P7 mouse taken one day after the isolation. Scale bar, 50  $\mu\text{m}$ .

(C) The image of hepatocytes isolated from the P56 mouse taken one day after the isolation. Scale bar, 50  $\mu\text{m}$ .

(D) The image of cardiomyocytes isolated from the P1 mouse taken one day after the isolation. Scale bar, 100  $\mu\text{m}$ .

(E) The image of cardiomyocytes isolated from the P7 mouse taken one day after the isolation. Scale bar, 100  $\mu\text{m}$ .

(F) The image of cardiomyocytes isolated from the P56 mouse taken on the day of isolation. Scale bar, 100  $\mu\text{m}$ .

### Supplementary Figure S2. Validation of RNA-seq results with quantitative PCR analyses.

(A) The quantitative PCR (qPCR) analysis of *Igfbp2*, a hepato-JAG, in the hepatocytes and cardiomyocytes. Data were normalized by *Polr2a*.

(B) The qPCR analysis of *Pleiotrophin*, a cardio-JAG, in the hepatocytes and cardiomyocytes. Data were normalized by *Polr2a*.

(C) The qPCR analysis of common JAGs in the hepatocytes and cardiomyocytes.

Data were normalized by *Polr2a*.

\* $p < 0.05$ , \*\* $p < 0.01$ , Student's  $t$  test. Data are represented as mean  $\pm$  SEM.

**Supplementary Figure S3. Association of the common JAGs to the human diseases.**

The rates for the successful annotation of the common JAGs and all the genes to any human disease.

**Supplementary Table S1. Sequences of the qPCR primers used in this study.**

| <b>Gene</b>         | <b>Forward</b>              | <b>Reverse</b>              |
|---------------------|-----------------------------|-----------------------------|
| <i>Polr2a</i>       | 5'-GAGTCCAGAACGAGTGCATGA-3' | 5'-ACAGGCAACACTGTGACAATC-3' |
| <i>Igfbp2</i>       | 5'-CAGACCTCGGGTGAGAAAAG-3'  | 5'-CTGCTACCACCTCCCAACAT-3'  |
| <i>Pleiotrophin</i> | 5'-TTTTCATCTTGGCAGCTGTG-3'  | 5'-ACACTCCACTGCCATTCTCC-3'  |
| <i>Ezh2</i>         | 5'-CCTGTTCCCACTGAGGATGT-3'  | 5'-GAGCCGTCTTTTTTCAGTTG-3'  |
| <i>Gpc3</i>         | 5'-ACGGGATGGTGAAAGTGAAG-3'  | 5'-AGGTGGTGATCTCGTTGTCC-3'  |
| <i>Uhrf1</i>        | 5'-ACGGTGCCTACTCATTGGTC-3'  | 5'-GCTTCTGGTCAGAGGACTGG-3'  |
| <i>Postn</i>        | 5'-TGGTCACTTCACGCTCTTTG-3'  | 5'-GCCACTTTGTCTCCCATGAT-3'  |
| <i>Map4k4</i>       | 5'-CTGGGTCCATCACAGACCTT-3'  | 5'-TCGGTGAATAACGTGGTGAA-3'  |
| <i>Prmt1</i>        | 5'-GCCTGCAAGTGAAGAGGAAC-3'  | 5'-CTCAGGACTGGTGGAGAAGC-3'  |
| <i>Tia1</i>         | 5'-AGATGCCCGTGTGGTAAAAG-3'  | 5'-TTCTGCATCCCATTGTGTTGA-3' |
| <i>Sirt6</i>        | 5'-CCTGTAGAGGGGAGCTGAGA-3'  | 5'-GAGGTACCCAGGGTGACAGA-3'  |

**Supplementary Figure S1. Appearance of the isolated hepatocytes and cardiomyocytes.**

Images of the isolated hepatocytes

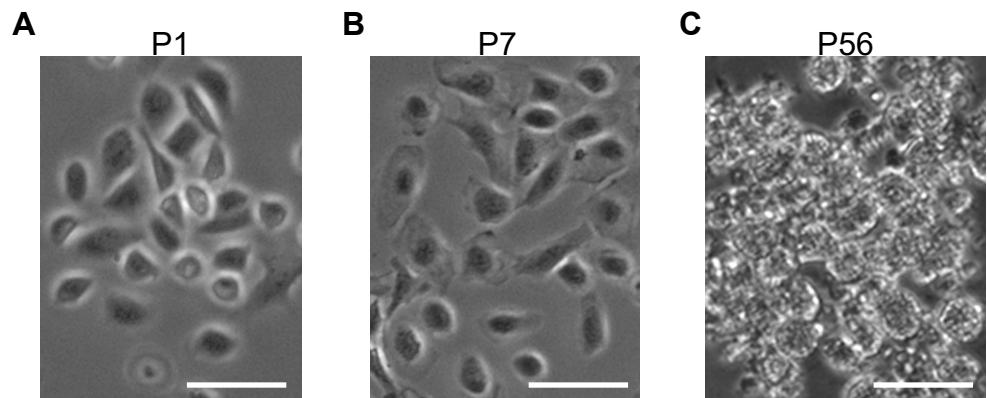

Images of the isolated cardiomyocytes

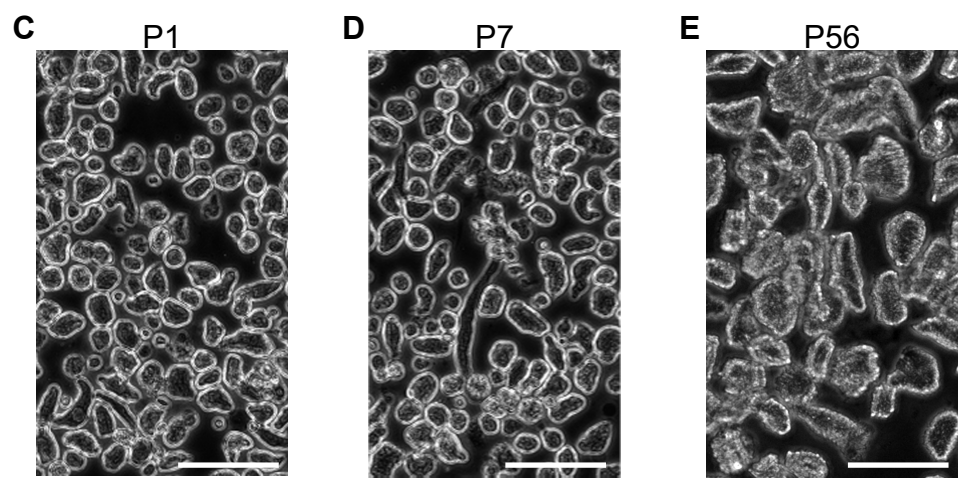

Supplementary Figure S2. Validation of RNA-seq results with quantitative PCR analyses.

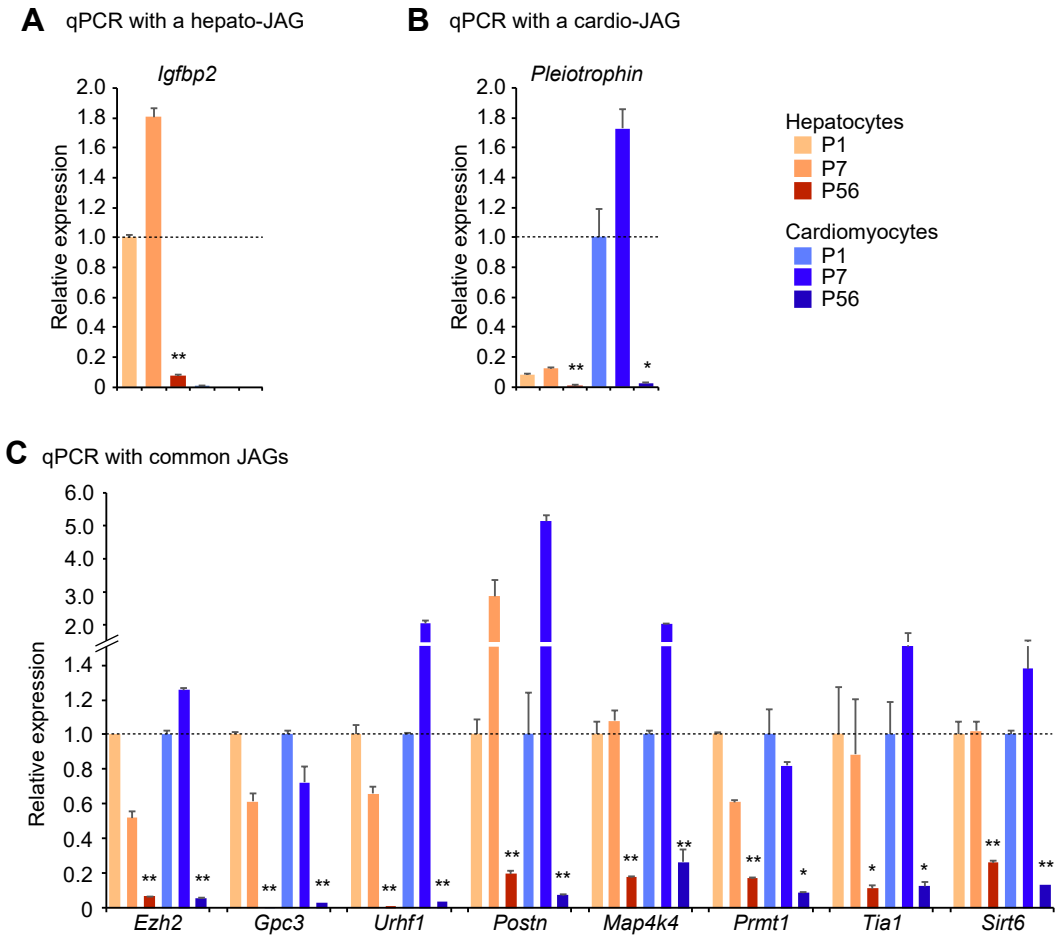

### Supplementary Figure S3. Association of common JAGs with human diseases.

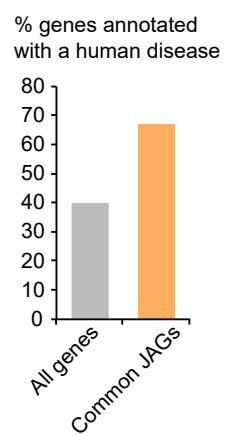

Supplement: MOESM1 [file 41598_2018_21445_MOESM1_ESM.pdf]
